# Supplementary material for: Selective exposure in different political information environments – How media fragmentation and polarization shape congruent news use
Source: PubMed Central journal article supplement — Eur J Commun. 2021 Jun 3;37(1):82–102. doi: 10.1177/02673231211012141 (PMC8958559; doi:10.1177/02673231211012141), 2021-06-03
Supplement: sj-pdf-1-ejc-10.1177_02673231211012141.pdf [file sj-pdf-1-ejc-10.1177_02673231211012141.pdf]

## Appendix

**Eight-item Likert scale for measuring self-reported selective exposure** (adopted from: Tsfati, 2016)

*Please indicate how much the following statements apply or do not apply to you. (1 = “does not apply at all” to 5 = “absolutely applies”)*

- (1) I try to avoid exposure to media outlets expressing irritating opinions.
- (2) I try to expose myself only to media outlets and news messages that are in line with my own attitudes.
- (3) I try to mainly use media that overlaps with my own views.
- (4) I never use particular media sources on the basis of their political orientation.
- (5) If I need to select between two op-ed pieces, I will choose the one that is closer to my opinions.
- (6) As far as particular political issues are concerned, I prefer to use media sources that represent positions similar to my own.
- (7) I do not read any articles that argue against my convictions.
- (8) I stop reading an article if it takes a position I do not share.

### **Description of the quasi-experimental design**

Before we provide more details on the procedures of our main study in more depth, we need to describe the steps we conducted beforehand to develop and validate our stimuli and further materials used in our survey-experiment. We strive for a maximum of external and internal validity in our experimental condition. This aim was achieved by extensive pilot testing the stimulus material that was ultimately used in the main survey experiment. We developed stimuli on eleven separate topics, tapping into very different political fields from economic, social and legal domains. In particular, we used news articles' snippets touching upon free trade, adoption rights to same-sex couples, climate change, international military interventions, stricter privacy laws, penalty reform, enforcing border patrols, stricter migration policies, enforcing austerity measures, private pension reforms, abortion, gun laws, social security, and mandatory vaccination. These stimuli were small article snippets ranging from 45 to 60 words with a headline (5 to 10 words) and a short introduction (40 to 50 words) into the article as well as a label for each topic such as privacy laws or free trade (see Figure 4). These news article snippets were translated into six different languages (Danish, English, German, French, Italian, Polish) by professional translators. To ensure that the length of the snippet does not influence article selection, articles from the same language group ranged on a maximum of 5 words in total length to keep them equal across topics. To enhance external validity, the news article snippets were furthermore cross-evaluated by journalists in the individual countries to mimic the journalistic styles within the specific countries. As participants were to select the news article snippets from the news overview and afterwards read the corresponding article, we further developed full-length articles for each of the eight news article snippets that ranged between 350 to 370 words (see Figure 5).

News article snippets were then thoroughly evaluated in a pilot test in all five countries (N = 600) with samples representative in terms of sex, age, and education for the individual national population. In the pilot test, we randomized the news article snippets, so each participant received ten snippets from five different topics, with both the pro and contra article for each topic.

Following Knobloch-Westerwick and Meng (2009) we then tested whether for each news article snippet, whether participants perceived the short introductory texts as similarly interesting while also perceiving them to advocate different political positions on the issue. To test this, we subtracted the values for perceived interest of the pro article from the contra article for each topic and conducted a one sample T-test separately for each country (results: Table 2

& 3). The same procedure was used for the perceived position of the article news snippets. We selected the topics free trade, privacy laws, penalty reform, and migration policies as those topics were comparable in terms of interest (the score does not show a significant difference from zero) and position (the score does show a significant difference from zero) of the article snippets across all five countries and six languages.

We conducted our study in two waves. The first part of the study was used to let participants indicate their positions on eight individual political topics (four of which later served as topics for our quasi-experiment). Participants evaluated eight statements on various political topics on whether they agree or disagree on the position advocated on a 100-point sliding-scale. This measure was later used to evaluate a person's stance on the individual issue and whether he/she later engaged with articles representing similar or dissimilar views, by splitting the measure at the midpoint and excluding participants who did not show a leaning to either side (n=63).

In the second wave, participants were told they were testing a news online magazine that focuses on current political issues in the individual's country. Participants were invited to browse the news overview and to select as many topics as they wish to read. For each participant, we randomized the order of the eight news article snippets. Participants were free to leave the news overview at any point. The news overview ended automatically after five minutes. The articles participants selected were unobtrusively tracked. Additionally, we also tracked the reading time of each article. In a next step, we compared the selection of articles by each participant with his prior indicated attitudes (indicated in Wave 1 of the survey). This allowed us to build two scores, one for the number of attitude-consistent and one for attitude-inconsistent articles chosen. We subtracted the score for attitude-inconsistent articles from the score for attitude-consistent articles selected, this way positive numbers indicated more attitude-consistent exposure while negative scores revealed a stronger tendency towards cross-cutting exposure. Finally, we weighted the score by dividing it by the total number of articles a participant chose overall.

**Table 2. Results from one-sample T-test comparing levels of interest between pro and contra article**

|    |                           | T             | df        | 95% C.I.     |             | N         | M            | SD           |
|----|---------------------------|---------------|-----------|--------------|-------------|-----------|--------------|--------------|
|    |                           |               |           | Lower        | Upper       |           |              |              |
| CH | <b>Free Trade</b>         | <b>.961</b>   | <b>98</b> | <b>-.156</b> | <b>.442</b> | <b>99</b> | <b>.143</b>  | <b>1.041</b> |
|    | Adoption Rights           | 1.268         | 96        | -.112        | .495        | 97        | .192         | 1.035        |
|    | Climate Politics          | 1.345         | 97        | -.134        | .676        | 98        | .271         | 1.395        |
|    | Military Interventions    | -.880         | 98        | -.469        | .184        | 99        | -.143        | 1.137        |
|    | <b>Privacy Laws</b>       | <b>.136</b>   | <b>97</b> | <b>-.288</b> | <b>.329</b> | <b>98</b> | <b>.021</b>  | <b>1.062</b> |
|    | <b>Penalty Reform</b>     | <b>-.943</b>  | <b>94</b> | <b>-.488</b> | <b>.177</b> | <b>95</b> | <b>-.156</b> | <b>1.107</b> |
|    | Border Patrol             | 1.055         | 98        | -.203        | .652        | 99        | .225         | 1.490        |
|    | <b>Migration Policies</b> | <b>-1.138</b> | <b>94</b> | <b>-.554</b> | <b>.154</b> | <b>95</b> | <b>-.200</b> | <b>1.179</b> |
|    | Austerity                 | -1.135        | 98        | -.453        | .126        | 99        | -.163        | 1.007        |
|    | Private Pensions          | -.260         | 96        | -.372        | .287        | 97        | -.043        | 1.122        |
|    | Abortion                  | -1.542        | 99        | -.599        | .079        | 100       | -.260        | 1.192        |
|    | Gun Laws                  | -1.220        | 97        | -.497        | .122        | 98        | -.188        | 1.065        |
|    | Social Security           | 1.300         | 96        | -.117        | .542        | 97        | .213         | 1.122        |
|    | Mandatory Vaccination     | .488          | 97        | -.260        | .427        | 98        | .083         | 1.182        |
| IT | <b>Free Trade</b>         | <b>1.614</b>  | <b>48</b> | <b>-.065</b> | <b>.596</b> | <b>49</b> | <b>.265</b>  | <b>1.151</b> |
|    | Adoption Rights           | -.925         | 48        | -.713        | .264        | 49        | -.225        | 1.699        |
|    | Climate Politics          | 4.410**       | 47        | .544         | 1.456       | 48        | 1.000        | 1.571        |
|    | Military Interventions    | -1.423        | 47        | -.553        | .095        | 48        | -.229        | 1.115        |
|    | <b>Privacy Laws</b>       | <b>1.030</b>  | <b>47</b> | <b>-.119</b> | <b>.369</b> | <b>48</b> | <b>.125</b>  | <b>.841</b>  |
|    | <b>Penalty Reform</b>     | <b>1.864</b>  | <b>50</b> | <b>-.033</b> | <b>.896</b> | <b>51</b> | <b>.431</b>  | <b>1.652</b> |
|    | Border Patrol             | 3.069*        | 48        | .211         | 1.013       | 49        | .612         | 1.397        |
|    | <b>Migration Policies</b> | <b>.204</b>   | <b>46</b> | <b>-.377</b> | <b>.462</b> | <b>47</b> | <b>.043</b>  | <b>1.429</b> |
|    | Austerity                 | -2.046*       | 46        | -.844        | -.007       | 47        | -.426        | 1.426        |

|                  |                           |               |           |              |             |           |              |              |
|------------------|---------------------------|---------------|-----------|--------------|-------------|-----------|--------------|--------------|
|                  | Private Pensions          | -1.086        | 46        | -.547        | .164        | 47        | -.192        | 1.209        |
|                  | Abortion                  | -.808         | 45        | -.683        | .292        | 46        | -.196        | 1.641        |
|                  | Gun Laws                  | .616          | 46        | -.241        | .454        | 47        | .106         | 1.184        |
|                  | Social Security           | -1.890        | 44        | -.643        | .021        | 45        | -.311        | 1.104        |
|                  | Mandatory Vaccination     | .683          | 46        | -.207        | .420        | 47        | .106         | 1.068        |
|                  | <b>Free Trade</b>         | <b>.141</b>   | <b>47</b> | <b>-.276</b> | <b>.317</b> | <b>48</b> | <b>.021</b>  | <b>1.021</b> |
|                  | Adoption Rights           | -1.372        | 45        | -.644        | .122        | 46        | -.261        | 1.290        |
|                  | Climate Politics          | 1.091         | 45        | -.147        | .495        | 46        | .174         | 1.081        |
|                  | Military Interventions    | .000          | 44        | -.264        | .264        | 45        | .000         | .879         |
|                  | <b>Privacy Laws</b>       | <b>1.443</b>  | <b>46</b> | <b>-.109</b> | <b>.662</b> | <b>47</b> | <b>.277</b>  | <b>1.314</b> |
|                  | <b>Penalty Reform</b>     | <b>.961</b>   | <b>43</b> | <b>-.125</b> | <b>.352</b> | <b>44</b> | <b>.114</b>  | <b>.784</b>  |
| PL               | Border Patrol             | 1.882         | 48        | -.022        | .675        | 49        | .327         | 1.214        |
|                  | <b>Migration Policies</b> | <b>.953</b>   | <b>50</b> | <b>-.195</b> | <b>.548</b> | <b>51</b> | <b>.177</b>  | <b>1.322</b> |
|                  | Austerity                 | -.252         | 47        | -.375        | .292        | 48        | -.042        | 1.148        |
|                  | Private Pensions          | .167          | 46        | -.235        | .277        | 47        | .021         | .872         |
|                  | Abortion                  | .216          | 42        | -.389        | .482        | 43        | .047         | 1.413        |
|                  | Gun Laws                  | -.866         | 48        | -.475        | .189        | 49        | -.143        | 1.155        |
|                  | Social Security           | 1.532         | 48        | -.070        | .519        | 49        | .225         | 1.026        |
|                  | Mandatory Vaccination     | .772          | 50        | -.189        | .424        | 51        | .118         | 1.089        |
|                  | <b>Free Trade</b>         | <b>-1.566</b> | <b>42</b> | <b>-.586</b> | <b>.074</b> | <b>43</b> | <b>-.256</b> | <b>1.071</b> |
|                  | Adoption Rights           | 2.192*        | 42        | .030         | .715        | 43        | .372         | 1.113        |
| Climate Politics | 2.676**                   | 39            | .134      | .966         | 40          | .550      | 1.300        |              |
| US               | Military Interventions    | -1.451        | 41        | -.627        | .103        | 42        | -.262        | 1.170        |
|                  | <b>Privacy Laws</b>       | <b>1.962</b>  | <b>46</b> | <b>-.008</b> | <b>.604</b> | <b>47</b> | <b>.298</b>  | <b>1.041</b> |
|                  | <b>Penalty Reform</b>     | <b>1.045</b>  | <b>43</b> | <b>-.148</b> | <b>.466</b> | <b>44</b> | <b>.159</b>  | <b>1.010</b> |
|                  | Border Patrol             | -3.607**      | 44        | -.935        | -.265       | 45        | -.600        | 1.116        |

|    |                           |               |           |              |             |           |              |              |
|----|---------------------------|---------------|-----------|--------------|-------------|-----------|--------------|--------------|
|    | <b>Migration Policies</b> | <b>-1.503</b> | <b>45</b> | <b>-.560</b> | <b>.081</b> | <b>46</b> | <b>-.239</b> | <b>1.079</b> |
|    | Austerity                 | -.339         | 40        | -.339        | .242        | 41        | -.049        | .921         |
|    | Private Pensions          | -1.000        | 40        | -.368        | .125        | 41        | -.122        | .781         |
|    | Abortion                  | -2.517*       | 46        | -.881        | -.098       | 47        | -.489        | 1.333        |
|    | Gun Laws                  | .401          | 44        | -.269        | .402        | 45        | .067         | 1.116        |
|    | Social Security           | -.221         | 44        | -.449        | .360        | 45        | -.044        | 1.348        |
|    | Mandatory Vaccination     | -2.183*       | 46        | -.613        | -.025       | 47        | -.319        | 1.002        |
|    | <b>Free Trade</b>         | <b>.387</b>   | <b>46</b> | <b>-.268</b> | <b>.396</b> | <b>47</b> | <b>.064</b>  | <b>1.131</b> |
|    | Adoption Rights           | .573          | 44        | -.280        | .502        | 45        | .111         | 1.301        |
|    | Climate Politics          | 2.657**       | 48        | .154         | 1.112       | 49        | .633         | 1.667        |
|    | Military Interventions    | .000          | 41        | -.300        | .300        | 42        | .000         | .963         |
|    | <b>Privacy Laws</b>       | <b>1.336</b>  | <b>43</b> | <b>-.127</b> | <b>.627</b> | <b>44</b> | <b>.250</b>  | <b>1.241</b> |
|    | <b>Penalty Reform</b>     | <b>-1.320</b> | <b>44</b> | <b>-.674</b> | <b>.141</b> | <b>45</b> | <b>-.267</b> | <b>1.355</b> |
|    | Border Patrol             | .651          | 48        | -.256        | .501        | 49        | .122         | 1.317        |
| DK | <b>Migration Policies</b> | <b>.311</b>   | <b>41</b> | <b>-.392</b> | <b>.535</b> | <b>42</b> | <b>.071</b>  | <b>1.488</b> |
|    | Austerity                 | -.746         | 40        | -.543        | .250        | 41        | -.146        | 1.256        |
|    | Private Pensions          | -1.108        | 43        | -.705        | .205        | 44        | -.250        | 1.496        |
|    | Abortion                  | -.438         | 47        | -.466        | .299        | 48        | -.083        | 1.318        |
|    | Gun Laws                  | .961          | 44        | -.244        | .688        | 45        | .222         | 1.551        |
|    | Social Security           | -.738         | 44        | -.580        | .269        | 45        | -.156        | 1.414        |
|    | Mandatory Vaccination     | .302          | 45        | -.370        | .501        | 46        | .065         | 1.467        |

**Table 3. Results from one-sample T-test comparing perceived issue position between pro and contra article**

|                           |                           | T                 | df              | 95% C.I.     |              | N            | M            | SD           |
|---------------------------|---------------------------|-------------------|-----------------|--------------|--------------|--------------|--------------|--------------|
|                           |                           |                   |                 | Lower        | Upper        |              |              |              |
| CH                        | <b>Free Trade</b>         | <b>8.619***</b>   | <b>47</b>       | <b>1.677</b> | <b>2.698</b> | <b>49</b>    | <b>.143</b>  | <b>1.041</b> |
|                           | Adoption Rights           | 5.293***          | 46              | 1.028        | 2.291        | 47           | .192         | 1.035        |
|                           | Climate Politics          | 7.756***          | 48              | 1.633        | 2.776        | 48           | .271         | 1.395        |
|                           | Military Interventions    | 8.918***          | 47              | 1.872        | 2.962        | 49           | -.143        | 1.137        |
|                           | <b>Privacy Laws</b>       | <b>5.076***</b>   | <b>47</b>       | <b>.981</b>  | <b>2.269</b> | <b>48</b>    | <b>.021</b>  | <b>1.062</b> |
|                           | <b>Penalty Reform</b>     | <b>7.414***</b>   | <b>42</b>       | <b>1.659</b> | <b>2.899</b> | <b>45</b>    | <b>-.156</b> | <b>1.107</b> |
|                           | Border Patrol             | 10.175***         | 49              | 2.167        | 3.233        | 49           | .225         | 1.490        |
|                           | <b>Migration Policies</b> | <b>6.689***</b>   | <b>44</b>       | <b>1.413</b> | <b>2.632</b> | <b>45</b>    | <b>-.200</b> | <b>1.179</b> |
|                           | Austerity                 | -3.410**          | 45              | -1.591       | -.409        | 49           | -.163        | 1.007        |
|                           | Private Pensions          | 1.879             | 42              | -.035        | .965         | 47           | -.043        | 1.122        |
|                           | Abortion                  | 8.147***          | 51              | 1.609        | 2.661        | 50           | -.260        | 1.192        |
|                           | Gun Laws                  | 5.494***          | 47              | 1.096        | 2.362        | 48           | -.188        | 1.065        |
|                           | Social Security           | 5.520***          | 47              | .940         | 2.018        | 47           | .213         | 1.122        |
|                           | Mandatory Vaccination     | 5.470***          | 45              | 1.140        | 2.469        | 48           | .083         | 1.182        |
|                           | IT                        | <b>Free Trade</b> | <b>6.147***</b> | <b>46</b>    | <b>1.188</b> | <b>2.344</b> | <b>47</b>    | <b>1.766</b> |
| Adoption Rights           |                           | 4.719**           | 49              | .781         | 1.939        | 50           | 1.360        | 2.038        |
| Climate Politics          |                           | 7.027***          | 47              | 1.413        | 2.546        | 48           | 1.979        | 1.951        |
| Military Interventions    |                           | 4.424**           | 45              | .770         | 2.056        | 46           | 1.413        | 2.166        |
| <b>Privacy Laws</b>       |                           | <b>4.043**</b>    | <b>48</b>       | <b>.564</b>  | <b>1.681</b> | <b>49</b>    | <b>1.122</b> | <b>1.943</b> |
| <b>Penalty Reform</b>     |                           | <b>3.657**</b>    | <b>49</b>       | <b>.577</b>  | <b>1.983</b> | <b>50</b>    | <b>1.280</b> | <b>2.475</b> |
| Border Patrol             |                           | 6.330***          | 50              | 1.218        | 2.351        | 51           | 1.784        | 2.013        |
| <b>Migration Policies</b> |                           | <b>3.152**</b>    | <b>43</b>       | <b>.417</b>  | <b>1.901</b> | <b>44</b>    | <b>1.159</b> | <b>2.439</b> |

|    |                           |                 |           |              |              |           |              |              |
|----|---------------------------|-----------------|-----------|--------------|--------------|-----------|--------------|--------------|
|    | Austerity                 | -2.954*         | 44        | -1.346       | -.254        | 45        | -.800        | 1.817        |
|    | Private Pensions          | 2.856*          | 43        | .267         | 1.551        | 44        | .909         | 2.111        |
|    | Abortion                  | 2.689*          | 45        | .202         | 1.407        | 46        | .804         | 2.029        |
|    | Gun Laws                  | 1.838           | 45        | -.056        | 1.230        | 46        | .587         | 2.166        |
|    | Social Security           | 4.999**         | 40        | .741         | 1.747        | 41        | 1.244        | 1.593        |
|    | Mandatory Vaccination     | 4.626***        | 45        | .798         | 2.028        | 46        | 1.413        | 2.072        |
|    | <b>Free Trade</b>         | <b>3.884**</b>  | <b>49</b> | <b>.492</b>  | <b>1.548</b> | <b>50</b> | <b>1.020</b> | <b>1.857</b> |
|    | Adoption Rights           | 3.394**         | 42        | .538         | 2.114        | 43        | 1.326        | 2.561        |
|    | Climate Politics          | 5.612***        | 45        | .934         | 1.979        | 46        | 1.457        | 1.760        |
|    | Military Interventions    | 2.951*          | 43        | .302         | 1.607        | 44        | .955         | 2.145        |
|    | <b>Privacy Laws</b>       | <b>2.123*</b>   | <b>39</b> | <b>.034</b>  | <b>1.416</b> | <b>40</b> | <b>.725</b>  | <b>2.160</b> |
|    | <b>Penalty Reform</b>     | <b>5.586***</b> | <b>40</b> | <b>1.074</b> | <b>2.292</b> | <b>41</b> | <b>1.683</b> | <b>1.929</b> |
| PL | Border Patrol             | 9.239***        | 46        | 1.747        | 2.721        | 47        | 2.234        | 1.658        |
|    | <b>Migration Policies</b> | <b>4.292**</b>  | <b>46</b> | <b>.701</b>  | <b>1.938</b> | <b>47</b> | <b>1.319</b> | <b>2.107</b> |
|    | Austerity                 | .470            | 42        | -.383        | .615         | 43        | .116         | 1.621        |
|    | Private Pensions          | 2.275*          | 47        | .063         | 1.021        | 48        | .542         | 1.650        |
|    | Abortion                  | 2.623*          | 40        | .213         | 1.641        | 41        | .927         | 2.263        |
|    | Gun Laws                  | 5.330***        | 44        | .885         | 1.960        | 45        | 1.422        | 1.790        |
|    | Social Security           | 4.504**         | 46        | .659         | 1.724        | 47        | 1.192        | 1.813        |
|    | Mandatory Vaccination     | 5.127***        | 51        | .948         | 2.168        | 52        | 1.558        | 2.191        |
|    | <b>Free Trade</b>         | <b>4.306**</b>  | <b>43</b> | <b>.652</b>  | <b>1.802</b> | <b>44</b> | <b>1.227</b> | <b>1.891</b> |
|    | Adoption Rights           | 3.995**         | 41        | .601         | 1.828        | 42        | 1.214        | 1.970        |
|    | Climate Politics          | 4.622***        | 44        | .765         | 1.947        | 45        | 1.356        | 1.967        |
| US | Military Interventions    | 5.156***        | 42        | .991         | 2.265        | 43        | 1.628        | 2.070        |
|    | <b>Privacy Laws</b>       | <b>2.445*</b>   | <b>47</b> | <b>.122</b>  | <b>1.253</b> | <b>48</b> | <b>.688</b>  | <b>1.948</b> |
|    | <b>Penalty Reform</b>     | <b>3.272**</b>  | <b>44</b> | <b>.452</b>  | <b>1.903</b> | <b>45</b> | <b>1.178</b> | <b>2.415</b> |



|    |                           |                 |           |              |              |           |              |              |
|----|---------------------------|-----------------|-----------|--------------|--------------|-----------|--------------|--------------|
|    | Border Patrol             | 6.846***        | 45        | 1.350        | 2.476        | 46        | 1.913        | 1.895        |
|    | <b>Migration Policies</b> | <b>2.776*</b>   | <b>45</b> | <b>.256</b>  | <b>1.613</b> | <b>46</b> | <b>.935</b>  | <b>2.284</b> |
|    | Austerity                 | -2.648*         | 32        | -1.394       | -.182        | 33        | -.788        | 1.709        |
|    | Private Pensions          | 1.532           | 42        | -.126        | .916         | 43        | .395         | 1.692        |
|    | Abortion                  | 5.404***        | 41        | .925         | 2.028        | 42        | 1.476        | 1.770        |
|    | Gun Laws                  | 3.833**         | 45        | .619         | 1.990        | 46        | 1.304        | 2.308        |
|    | Social Security           | 2.680*          | 47        | .161         | 1.131        | 48        | .646         | 1.669        |
|    | Mandatory Vaccination     | 4.191***        | 41        | .654         | 1.870        | 42        | 1.262        | 1.951        |
|    | <b>Free Trade</b>         | <b>5.506***</b> | <b>42</b> | <b>.987</b>  | <b>2.129</b> | <b>43</b> | <b>1.558</b> | <b>1.856</b> |
|    | Adoption Rights           | 6.399***        | 43        | 1.292        | 2.481        | 44        | 1.886        | 1.956        |
|    | Climate Politics          | 9.372***        | 47        | 1.996        | 3.087        | 48        | 2.542        | 1.879        |
|    | Military Interventions    | 5.923***        | 37        | 1.177        | 2.402        | 38        | 1.790        | 1.862        |
|    | <b>Privacy Laws</b>       | <b>4.020**</b>  | <b>41</b> | <b>.569</b>  | <b>1.717</b> | <b>42</b> | <b>1.143</b> | <b>1.842</b> |
|    | <b>Penalty Reform</b>     | <b>6.148***</b> | <b>43</b> | <b>1.298</b> | <b>2.566</b> | <b>44</b> | <b>1.932</b> | <b>2.084</b> |
| DK | Border Patrol             | 7.693***        | 50        | 1.463        | 2.497        | 51        | 1.980        | 1.838        |
|    | <b>Migration Policies</b> | <b>2.252*</b>   | <b>41</b> | <b>.084</b>  | <b>1.535</b> | <b>42</b> | <b>.810</b>  | <b>2.329</b> |
|    | Austerity                 | -3.085**        | 38        | -1.316       | -.273        | 39        | -.795        | 1.609        |
|    | Private Pensions          | 1.432           | 41        | -.196        | 1.148        | 42        | .476         | 2.155        |
|    | Abortion                  | 4.876***        | 46        | .825         | 1.984        | 47        | 1.404        | 1.974        |
|    | Gun Laws                  | 2.875*          | 43        | .278         | 1.586        | 44        | .932         | 2.150        |
|    | Social Security           | 2.424*          | 40        | .126         | 1.387        | 41        | .756         | 1.997        |
|    | Mandatory Vaccination     | 5.456***        | 43        | 1.032        | 2.241        | 44        | 1.636        | 1.989        |

Figure 4. News site overview

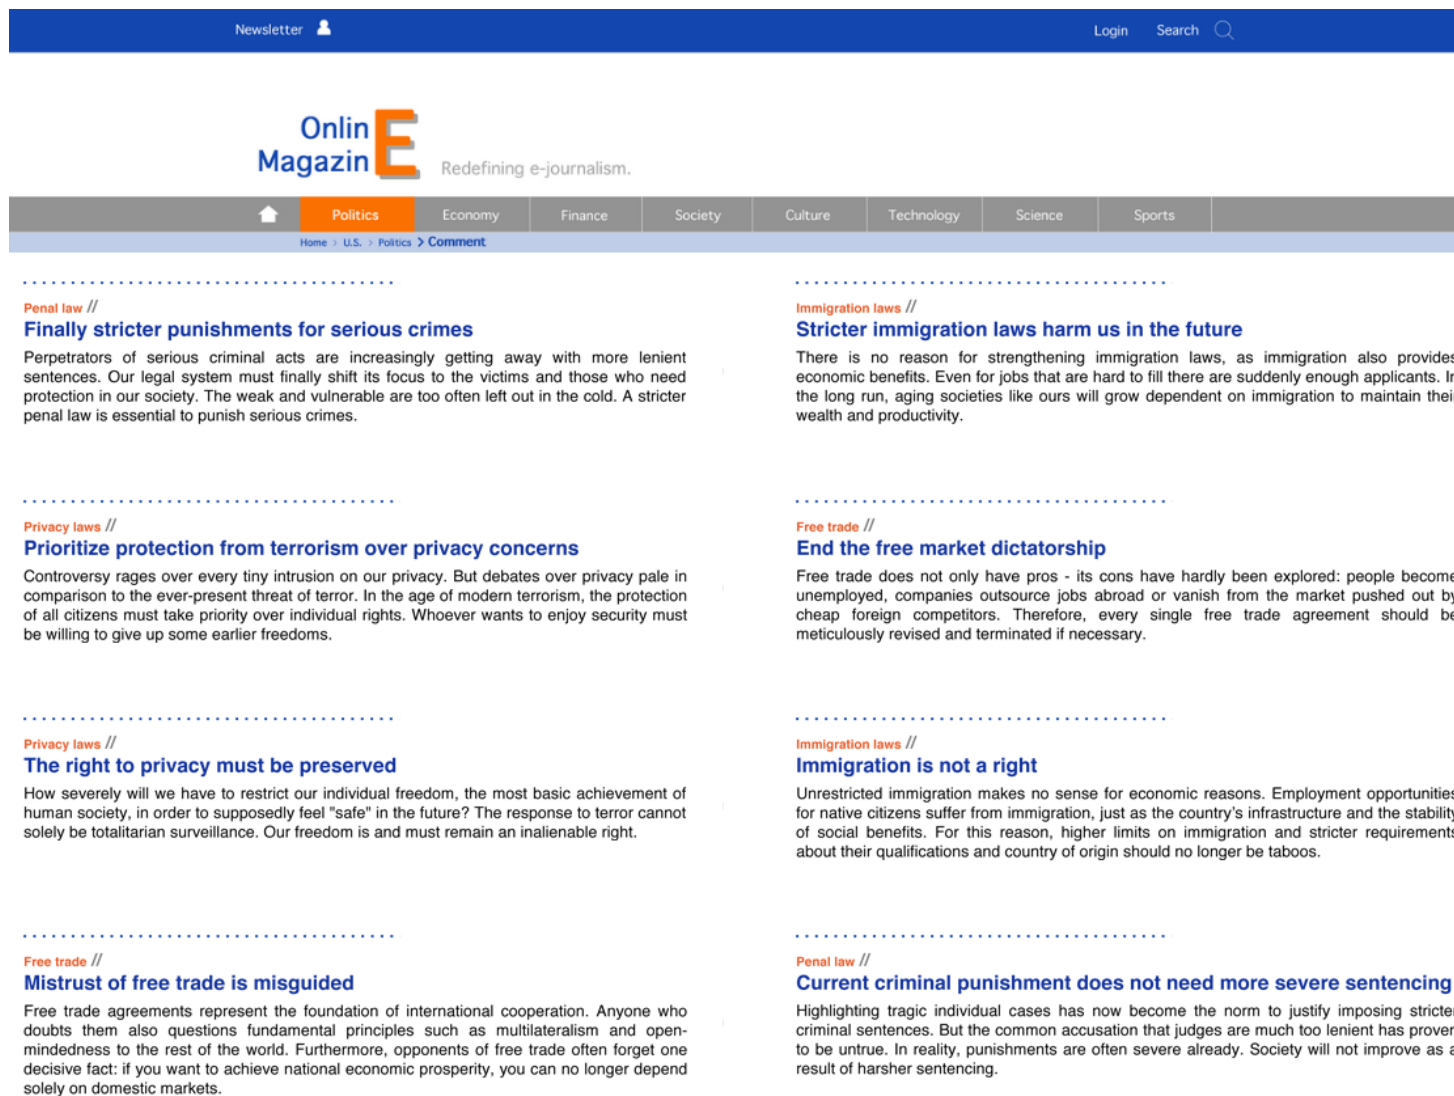

**Figure 5. Example full article**

Newsletter 
Login Search

Redefining e-journalism.

Home > U.S. > Politics > Comment

USA

---

pm from Washington

July 16, 2018

Penal law //

Current criminal punishment does not need more severe sentencing

Highlighting tragic individual cases has now become the norm to justify imposing stricter criminal sentences. But the common accusation that judges are much too lenient has proven to be untrue. In reality, punishments are often severe already. Society will not improve as a result of harsher sentencing.

Source: [www.washingtonpost.com](#)

Under the term "cushy justice," legal authorities have long been badgered from the side of criminal law populists - because the penalties uphold the law. But those who are willing to deal in facts instead of in inflammatory news, will quickly realize that over- leniency in sentencing is not the current reality. The opposite is true.

In reality, judges are now issuing significantly longer sentences for comparable offenses than they did just a few years ago. The justice system has also become much more restrictive on the issue of custody in recent years. And the people's tenaciously demanded zero-tolerance policy has led to far fewer criminals seeing early parole. This, in spite of the fact that re-socialization as quickly as possible after serving a sentence is not only in the interest of effective criminal prevention, but also relieves dangerously overcrowded prisons.

Nobody seems to be interested in these realities in the fight for harsher sentences. Instead, many would rather bemoan the perceived trivialization of violent crime by the justice system. This position arises from arguing with anecdotal evidence, not once backed by facts or data. Obviously, individual cases do not make a trend.

Source: [www.washingtonpost.com](#)

Even more worrying, is the trend in prominent crimes where a factual examination of the evidence and a judgment based on the applicable law is deemed to be superfluous. Long before charges are filed, the media has already given a thumbs up or down to both the offender and the victims. Online opinion is quick to pronounce judgment, and claim with unflinching self-assurance that the law has spoken in the name of the people, without ever opening a case file. The notion of law is all good and well, as long as it doesn't get in the way of the populist mind eager for quick retribution. It is time to get down to business and get back to the facts: Our penal law in its existing form is perfectly adequate.

**Table 4.** Sociodemographic compared by country

|    | Female (%) | Age (Mean, SD) | Secondary education (%) |
|----|------------|----------------|-------------------------|
| US | 48.8       | 47.0 (12.0)    | 47.6                    |
| IT | 52.1       | 45.8 (13.1)    | 42.9                    |
| PL | 53.7       | 43.3 (12.8)    | 49.3                    |
| CH | 50.4       | 47.3 (14.1)    | 65.3                    |
| DK | 49.9       | 55.3 (12.5)    | 45.4                    |

**Table 5.** Normalized means of three selective exposure indicators

|                  | US   |      | IT   |      | PL   |      | CH   |      | DK   |      | Overall |      |
|------------------|------|------|------|------|------|------|------|------|------|------|---------|------|
|                  | M    | SD   | M       | SD   |
| Self-reported SE | .548 | .175 | .547 | .201 | .559 | .225 | .454 | .193 | .431 | .200 | .510    | .206 |
| Perceived SE     | .730 | .189 | .688 | .184 | .738 | .167 | .727 | .166 | .726 | .147 | .721    | .173 |
| Actual SE        | .568 | .264 | .539 | .264 | .528 | .264 | .571 | .251 | .561 | .269 | .553    | .263 |

NOTE: All three selective exposure measures were rescaled on a scale ranging from 0 to 1 to make them comparable.

## References

- Knobloch-Westerwick, S., & Meng, J. (2009). Looking the Other Way. *Communication Research, 36*(3), 426–448. <https://doi.org/10.1177/0093650209333030>
- Tsfati, Y. (2016). A New Measure for the Tendency to Select Ideologically Congruent Political Information: Scale Development and Validation. *International Journal of Communication, 10*, 26.
